# Supplementary material for: Dectin-1 genetic deficiency predicts chronic lung allograft dysfunction and death
Source: JCI journal article supplement (doi:10.1172/jci.insight.133083), 2019-10-15
Supplement: sd1 [file 1]

## SUPPLEMENTAL MATERIALS

### Supplemental Acknowledgements

We thank Michelle Oyster, Laurel Kalman, and Feng Rui from the LTOG research team. In addition, we thank Chiyo Uchida, Edelyn Bautista, Linda Nicola, Mary Beier, Daphne Penaflor, Michelle Devaux, Michelle Ramirez, Fredde Foster, David Prince, AnaMarie Goscila, Mary Heindel, Ivy Sparks, Irene Junejo, Bonnie Slater, Cecilia Lemieux, Paul Tan, Nelson Mercado, Anna Volfson, Karen Neun, Blake Young, Juliet Zabel for instrumental aid in collecting study samples at UCSF. We thank Paul Blanc for manuscript review and Cliff Lowell for experimental advice. The GTEx Project was supported by the Common Fund of the Office of the Director of the National Institutes of Health, and by NCI, NHGRI, NHLBI, NIDA, NIMH, and NINDS.

#### \*Lung Transplant Outcomes Group Contributors

| <b><u>Site</u></b>                         | <b><u>Principal Investigator</u></b> | <b><u>Co-Investigator(s)</u></b> | <b><u>Study Coordinator(s)</u></b> |
|--------------------------------------------|--------------------------------------|----------------------------------|------------------------------------|
| <b>University of Pennsylvania</b>          | Jason D. Christie, M.D.              | Josh Diamond, M.D.               | Michelle Oyster                    |
|                                            |                                      | Ed Cantu, M.D.                   | Melanie Brown                      |
|                                            |                                      |                                  | Melanie Rushefski                  |
|                                            |                                      | Mary Porteous                    | Laurel Kalman (data management)    |
| <b>Columbia University</b>                 | David J. Lederer, M.D.               | Joshua Sonnett, M.D.             | Wendy Gonzalez                     |
|                                            |                                      |                                  | Onumaraekwu Opara                  |
| <b>University of Alabama at Birmingham</b> | Keith M. Wille, M.D.                 | Enrique Diaz-Guzman, M.D.        | Mallory Halpin                     |
|                                            |                                      |                                  | Lanier O'Hare                      |
| <b>Stanford University</b>                 | Ann Weinacker, M.D.                  | Gundeep S Dhillon, M.D.          | Tal Alfasi                         |
|                                            |                                      | David Weill, M.D.                |                                    |
|                                            |                                      |                                  |                                    |
| <b>Johns Hopkins University</b>            | Jonathan Orens, M.D.                 | Christian Merlo                  | Joby Matthew                       |
|                                            | Pali Shah, M.D.                      | Leann Silhann                    |                                    |
|                                            |                                      | Ashish Shah                      |                                    |

|                                               |                       |                      |                          |
|-----------------------------------------------|-----------------------|----------------------|--------------------------|
|                                               |                       |                      |                          |
| <b>University of Michigan</b>                 | Vibha Lama, M.D.      |                      | Mary Maliarik            |
|                                               |                       |                      | Lisa Pollack             |
| <b>University of Pittsburgh</b>               | John McDyer, M.D.     |                      | Brianna Hewitt           |
|                                               |                       |                      | Swati Gulati             |
|                                               |                       |                      | Vera Iouchmanov          |
| <b>Duke University</b>                        | Laurie Snyder, M.D.   | Scott Palmer, M.D.   | Allie Frear              |
|                                               |                       | Matt Hartwig, M.D.   | Erika Bush               |
|                                               |                       |                      | <u>Brittany McDowell</u> |
| <b>University of Chicago</b>                  | Ed Garrity, M.D.      | Chris Wigfield, M.D. |                          |
|                                               |                       | P.J. McShane, M.D.   |                          |
| <b>Indiana University</b>                     | Chadi Hage, M.D.      | David Roe, M.D.      | Jean Nash                |
|                                               |                       | Michael Duncan, M.D. |                          |
| <b>University of California San Francisco</b> | Jonathan Singer, M.D. | Carolyn Calfee, M.D. | Allison Soong            |
|                                               |                       | Jasleen Kukreja      |                          |
|                                               |                       | John Greenland       |                          |
| <b>Vanderbilt University</b>                  | Lorraine Ware, M.D.   |                      |                          |

## **Supplemental Methods**

### **Cell culture cytokine analysis**

Peripheral blood mononuclear cells (PBMC) from previously genotyped wildtype *CLEC7A* subjects (AA) and *CLEC7A* heterozygotes (AC) at an initial concentration of  $5 \times 10^6$  were thawed from  $-80^{\circ}\text{C}$  and rested overnight. Cells ( $1 \times 10^5$ ) were incubated for 4 hours in R10 media (RPMI supplemented with 10% human serum) with the dectin-1 agonist zymosan (10  $\mu\text{g/mL}$ , Sigma-Aldrich, #58856-93-2) and tacrolimus (10  $\text{ng/mL}$ , VWR International), or with 150  $\mu\text{L}$  of R10 media as a negative control. Cytokines were measured from supernatant using multiplex ELISA (Discovery Assay, Eve Technologies).

## Supplemental Results

### Cytokine production is intact in *CLEC7A* variants following zymosan stimulation

Cytokines important for CD4 T-cell signaling were measured from cell culture supernatant after stimulation with the dectin-1 agonist zymosan. Because zymosan also signals via TLR-2 in an NFAT-dependent manner, which may be inhibited by tacrolimus immunosuppression, we also included tacrolimus in the stimulation assays. The results of experiments from 8 subjects heterozygous for *CLEC7A* AC loss-of-function polymorphisms and 8 subjects with wildtype *CLEC7A* genotypes are displayed in Supplemental Figure 1. Several cytokines in supernatant were increased after 4 hours of stimulation compared to control: IL-1, IL-6, IL-8, IL-10, IL-13, IL-17, IL-23, and TNF $\alpha$ . Notably, IFN-gamma, IL-2 and IL-12 concentrations were too low to detect reliably in this assay. No statistically significant differences in cytokine production was observed between genotypes after adjustment for multiple comparisons.

### Y238X carriers were more likely to experience an increase in chronic immunosuppression after bronchoscopy.

This database contained 1134 bronchoscopy encounters for 220 subjects with a median of 16 bronchoscopies documented per subject. Bronchoscopies were most often performed for surveillance purposes with cough being the most reported sign or symptom at the time of bronchoscopy. We had 246 cases of acute cellular rejection with 61% occurring within the first year following transplantation. The most common type of pathogen identified was bacteria; though, the most common organism was Rhinovirus (n = 99). The most common fungus identified was Aspergillus. Details of the classes of microbes identified during the study period can be found in Supplemental Table 3. There were no differences in the frequencies of bacteria, fungus, virus, or Acid Fast Bacillus isolated by genotype. Supplemental Figure 3 contains the results from the generalized estimating equation analysis comparing bronchoscopy endpoints between Y238X

carriers and subjects without dectin-1 polymorphisms. We found no statistically significant differences between bronchoscopy indication, signs and symptoms, or pathology findings between the dectin-1 genotypes. Compared to wildtype subjects, dectin-1 carriers were 3.2 times more likely to experience an increase in chronic immunosuppression following bronchoscopy (CI 1.4-7.6,  $p = 0.008$ ) and 0.6 times less likely to be treated for an acute infection (CI 0.3-0.9,  $p = 0.027$ ).

**Supplemental Figure 1. Similar cytokine production following stimulation between Y238X variant AC and *CLEC7A* wildtype individuals.** Box and whisker plots depict cytokine concentrations of cell culture supernatant after 4 hours of zymosan and tacrolimus stimulation from dectin-1 wildtype (AA, green, n = 8) and heterozygous (AC, orange, n = 8) subjects. Several cytokines in supernatant were increased after 4 hours of stimulation compared to control. There was no difference in the concentration of TNF-alpha after stimulation. Differences were assessed by Student's t-test adjusted for multiple comparisons as described by Benjamini and Hochberg. \*In an analysis unadjusted for false discover rate (fdr), IL-23 was increased in the stimulated dectin-1 heterozygous supernatant (36 IQR 29 - 38 pg/mL) compared to stimulated wildtype supernatant (25 IQR 16 - 26 pg/mL,  $p = 0.04$  fdr unadjusted,  $p = 0.1$  fdr adjusted).

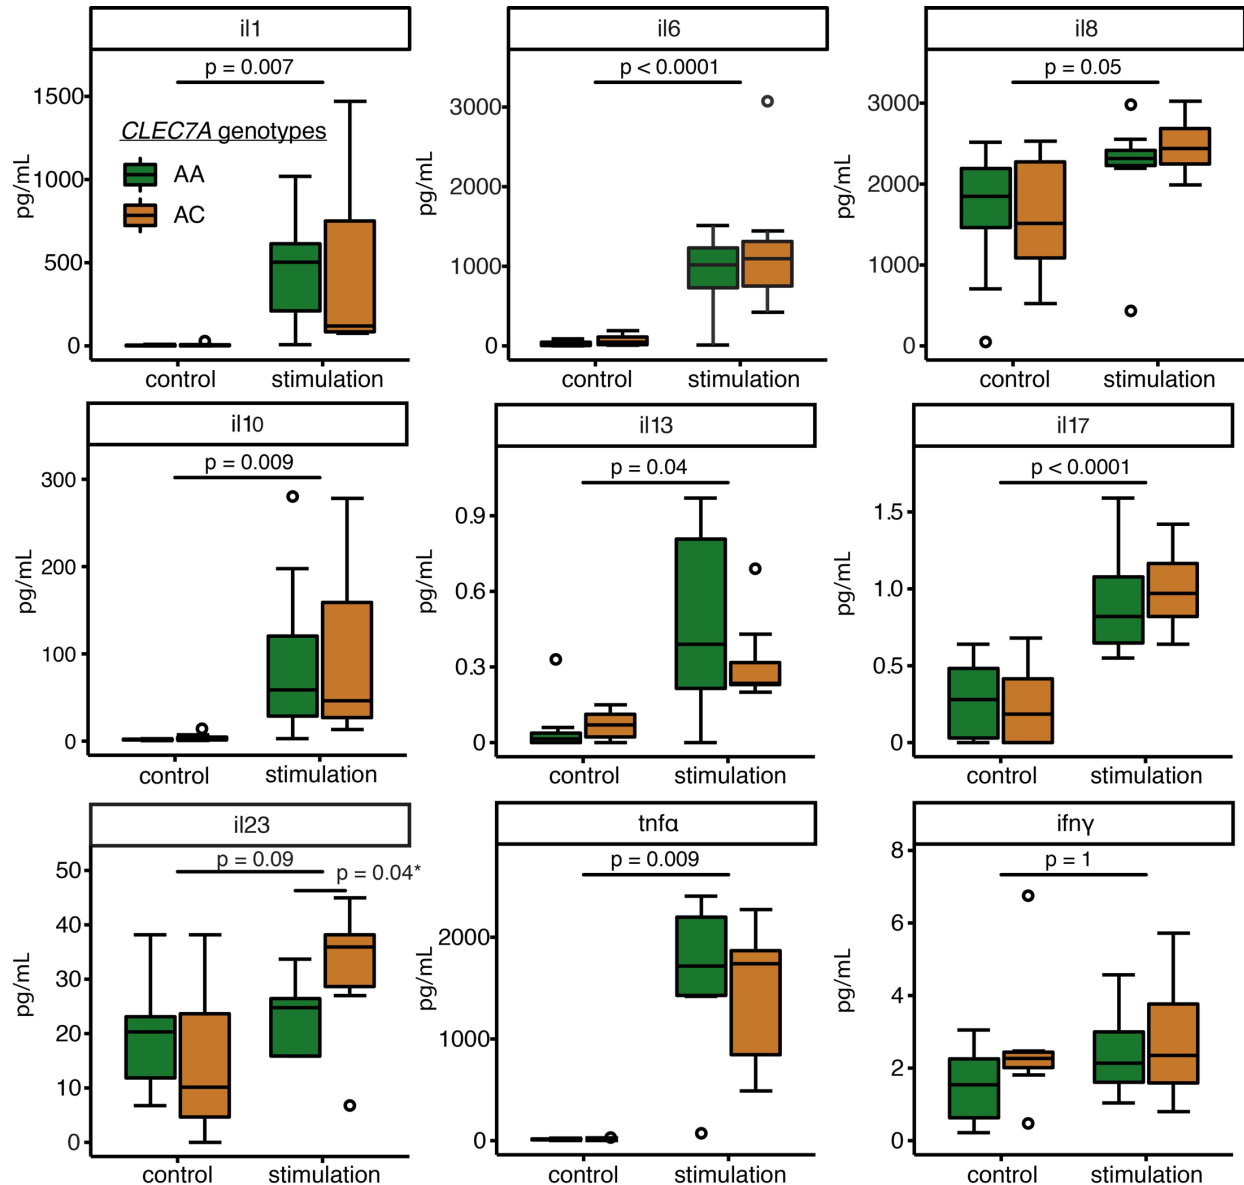

**Supplemental Figure 2: Subject inclusion and exclusion diagram for the UCSF cohort.**

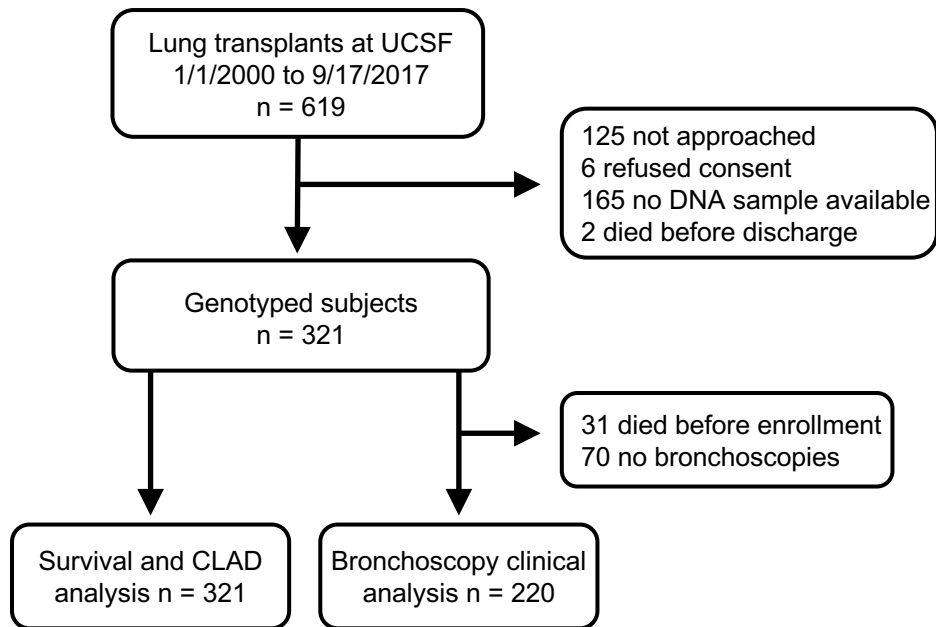

**Supplemental Figure 3:** Associations between dectin-1 genotypes and bronchoscopy procedure indication and outcome. There were no differences in bronchoscopy indication, signs symptoms at bronchoscopy encounter, or pathology findings from transbronchial biopsy. Dectin-1 carriers (AC and CC) demonstrated decreased odds of being treated with antimicrobials (OR 0.6, CI 0.3-0.9,  $p = 0.027$ ) and increased odds of undergoing an increase in their chronic immunosuppression (OR 3.2, CI 1.4-7.6,  $p = 0.008$ ) compared to wild type subjects. Legend: ↓ Spirometry = changes in forced vital capacity or forced expiratory volume in 1 second, ↑ Chronic Meds = increased chronic immunosuppression.

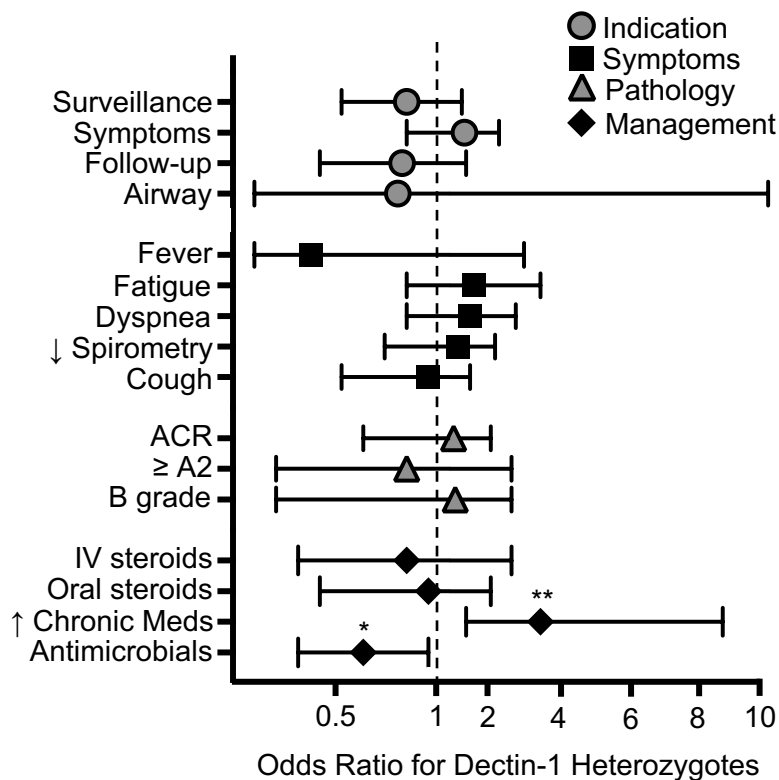

**Supplemental Table 1: Dectin-1 Protein by CLAD Phenotype.** Samples from this nested analysis are from the UCSF cohort and were matched on age and time after transplant.

|                                                | CLAD        | No CLAD     | <i>p</i> value |
|------------------------------------------------|-------------|-------------|----------------|
| Subjects (n)                                   | 25          | 20          |                |
| Age at transplantation,<br>mean years $\pm$ SD | 56 $\pm$ 11 | 56 $\pm$ 13 | 0.73           |
| Male gender (%)                                | 50          | 56          | 0.73           |
| Transplant type: N (%)                         |             |             | 0.74           |
| Double                                         | 22 (88)     | 18 (90)     |                |
| Heart and Lung                                 | 0           | 0           |                |
| Single                                         | 3 (12)      | 2 (10)      |                |
| Race/Ethnicity: N (%)                          |             |             | 0.79           |
| Caucasian                                      | 18 (72)     | 16 (80)     |                |
| African American                               | 0           | 0           |                |
| Hispanic                                       | 5 (20)      | 2 (10)      |                |
| Other                                          | 2 (8)       | 1 (5)       |                |
| Transplant indication group: N (%)             |             |             | 0.73           |
| A (COPD)                                       | 6 (24)      | 4 (20)      |                |
| B (Pulmonary Hypertension)                     | 2 (8)       | 1 (5)       |                |
| C (Cystic Fibrosis)                            | 0           | 0           |                |
| D (Pulmonary Fibrosis)                         | 18 (72)     | 15 (75)     |                |

**Supplemental Table 2:** Characteristics of subjects included in prospective bronchoscopy analysis and immunophenotyping analysis compared to subjects not included from genotyping cohort.

|                                        | Entire Cohort | Bronchoscopy Analysis | <i>p</i> |
|----------------------------------------|---------------|-----------------------|----------|
| Subjects: N                            | 321           | 220                   |          |
| <i>CLEC7A</i> genotypes                |               |                       | 0.72     |
| AA                                     | 280           | 192                   |          |
| AC&CC                                  | 41            | 28                    |          |
| Age at transplant, mean years $\pm$ SD | 55 $\pm$ 12   | 55 $\pm$ 12           | .35      |
| Male gender (%)                        | 54            | 57                    | 0.07     |
| Transplant type: N                     |               |                       | 0.81     |
| Double                                 | 288           | 198                   |          |
| Other                                  | 33            | 22                    |          |
| Race/Ethnicity: N                      |               |                       | 0.07     |
| Caucasian                              | 241           | 158                   |          |
| Other                                  | 80            | 62                    |          |
| Indication: N                          |               |                       | 0.1      |
| D (IPF)                                | 210           | 156                   |          |
| A,B,C                                  | 111           | 64                    |          |

**Supplemental Table 3:** Findings of the bronchoscopy culture data showing no differences between genotypes in the frequencies of the 10 most commonly isolated microbes on bronchoscopy. There was also no difference in the frequency of isolation of any bacteria, virus, fungus, or Acid Fast Bacillus. There were 1134 bronchoscopies performed during the study period (AA genotype, n=999; AC and CC genotypes, n = 135).

| Microbe                             | AA genotype | AC or CC genotype | <i>p</i> value |
|-------------------------------------|-------------|-------------------|----------------|
| <i>Penicillium</i>                  | 187         | 22                | 0.6            |
| <i>Rhinovirus</i>                   | 90          | 9                 | 0.5            |
| <i>Aspergillus species</i>          | 83          | 11                | 1              |
| <i>Haemophilus parainfluenza</i>    | 68          | 7                 | 0.6            |
| <i>Pseudomonas aeruginosa</i>       | 50          | 5                 | 0.7            |
| <i>Staphylococcus aeruginosa</i>    | 27          | 2                 | 0.6            |
| <i>Stenotrophomonas maltophilia</i> | 21          | 6                 | 0.2            |
| <i>Mycobacterium gordonae</i>       | 12          | 3                 | 0.6            |
| <i>Escherichia coli</i>             | 10          | 0                 | 0.5            |
| <i>Klebsiella species</i>           | 9           | 1                 | 1              |
| Any bacteria                        | 975         | 128               | 0.1            |
| Any virus                           | 125         | 15                | 0.8            |
| Any fungus                          | 341         | 40                | 0.3            |
| Any Acid Fast Bacilli               | 18          | 4                 | 0.6            |

## Supplemental References

1. S. Stewart *et al.*, Revision of the 1996 working formulation for the standardization of nomenclature in the diagnosis of lung rejection. *The Journal of heart and lung transplantation : the official publication of the International Society for Heart Transplantation* **26**, 1229-1242 (2007).
2. G. M. Verleden, G. Raghu, K. C. Meyer, A. R. Glanville, P. Corris, A new classification system for chronic lung allograft dysfunction. *J. Heart Lung Transplant.* **33**, 127-133 (2014).
3. J. R. Greenland *et al.*, Association of large-airway lymphocytic bronchitis with bronchiolitis obliterans syndrome. *Am. J. Respir. Crit. Care Med.* **187**, 417-423 (2013).
4. J. R. Greenland *et al.*, Bronchoalveolar lavage cell immunophenotyping facilitates diagnosis of lung allograft rejection. *Am. J. Transplant.* **14**, 831-840 (2014).
5. M. Sato, D. M. Hwang, T. K. Waddell, L. G. Singer, S. Keshavjee, Progression pattern of restrictive allograft syndrome after lung transplantation. *J. Heart Lung Transplant.* **32**, 23-30 (2013).
6. A. R. Glanville *et al.*, Chronic lung allograft dysfunction: Definition and update of restrictive allograft syndrome-A consensus report from the Pulmonary Council of the ISHLT. *J. Heart Lung Transplant.* **38**, 483-492 (2019).
7. J. M. Diamond *et al.*, Variation in PTX3 is associated with primary graft dysfunction after lung transplantation. *Am. J. Respir. Crit. Care Med.* **186**, 546-552 (2012).
8. H. M. Wain *et al.*, Guidelines for human gene nomenclature. *Genomics* **79**, 464-470 (2002).
9. Design and Implementation of the International Genetics and Translational Research in Transplantation Network. *Transplantation* **99**, 2401-2412 (2015).

10. J. G. Smith, R. E. Gerszten, Emerging Affinity-Based Proteomic Technologies for Large-Scale Plasma Profiling in Cardiovascular Disease. *Circulation* **135**, 1651-1664 (2017).
11. H. S. Goodridge, R. M. Simmons, D. M. Underhill, Dectin-1 stimulation by *Candida albicans* yeast or zymosan triggers NFAT activation in macrophages and dendritic cells. *J. Immunol.* **178**, 3107-3115 (2007).
12. D. T. Dugger, J. E. Gerriets, L. A. Miller, Attenuated Airway Epithelial Cell Interleukin-22R1 Expression in the Infant Nonhuman Primate Lung. *Am. J. Respir. Cell Mol. Biol.* **53**, 761-768 (2015).
13. J. Lonsdale *et al.*, The Genotype-Tissue Expression (GTEx) project. *Nat. Genet.* **45**, 580 (2013).
14. H. Carrillo-Meléndrez *et al.*, Role of HLA-DR Alleles to Increase Genetic Susceptibility to Onychomycosis in Nail Psoriasis. *Skin Appendage Disorders* **2**, 22-25 (2016).
15. H. Ongen, A. Buil, A. A. Brown, E. T. Dermitzakis, O. Delaneau, Fast and efficient QTL mapper for thousands of molecular phenotypes. *Bioinformatics (Oxford, England)* **32**, 1479-1485 (2016).
16. L. J. Carithers *et al.*, A Novel Approach to High-Quality Postmortem Tissue Procurement: The GTEx Project. *Biopreserv Biobank* **13**, 311-319 (2015).
